# Supplementary material
Source: PubMed Central journal article supplement (PMC7259512)
Supplement: jciinsight-5-137263-s125.pdf [file jciinsight-5-137263-s125.pdf]

**Supplemental Table 1**

|             | p_val    | avg_logFC | p_val_adj |
|-------------|----------|-----------|-----------|
| <b>Ccl5</b> | 9.48E-15 | 1.64375   | 2.95E-10  |
| Slpi        | 4.58E-12 | 1.32228   | 1.42E-07  |
| Cxcl9       | 6.57E-13 | 1.29667   | 2.04E-08  |
| C3          | 6.84E-22 | 1.27328   | 2.12E-17  |
| Dusp1       | 9.80E-13 | 1.26357   | 3.04E-08  |
| AA467197    | 3.52E-11 | 1.1813    | 1.09E-06  |
| Ass1        | 7.62E-18 | 1.1622    | 2.37E-13  |
| Ly6i        | 6.51E-24 | 1.06324   | 2.02E-19  |
| Clec4d      | 8.96E-18 | 1.05614   | 2.78E-13  |
| Neat1       | 1.30E-13 | 1.02051   | 4.05E-09  |
| AW112010    | 7.45E-14 | 0.98972   | 2.31E-09  |
| Fth1        | 3.87E-25 | 0.96366   | 1.20E-20  |
| H2-Q7       | 8.31E-15 | 0.94834   | 2.58E-10  |
| Ly6a        | 1.77E-19 | 0.91886   | 5.49E-15  |
| Acod1       | 4.99E-14 | 0.84767   | 1.55E-09  |
| Txn1        | 6.17E-15 | 0.80481   | 1.92E-10  |
| Fosb        | 2.33E-13 | 0.72134   | 7.23E-09  |
| Bst1        | 1.25E-17 | 0.70764   | 3.90E-13  |
| B2m         | 2.21E-13 | 0.66535   | 6.87E-09  |
| C1qc        | 8.51E-12 | -0.42674  | 2.64E-07  |
| mt-Nd1      | 2.22E-11 | -0.42989  | 6.89E-07  |
| C1qa        | 7.49E-13 | -0.43631  | 2.33E-08  |
| mt-Co2      | 1.47E-13 | -0.44139  | 4.56E-09  |
| mt-Cytb     | 1.89E-13 | -0.44456  | 5.86E-09  |
| mt-Nd4      | 1.88E-11 | -0.44992  | 5.84E-07  |
| mt-Co3      | 1.27E-15 | -0.47723  | 3.94E-11  |
| Tpm3        | 1.19E-13 | -0.50229  | 3.69E-09  |
| Ms4a7       | 7.37E-12 | -0.64787  | 2.29E-07  |
| mt-Nd3      | 1.73E-13 | -0.65141  | 5.36E-09  |
| mt-Atp6     | 1.02E-22 | -0.66727  | 3.17E-18  |
| Dab2        | 4.80E-15 | -0.69147  | 1.49E-10  |
| Fcrls       | 5.70E-12 | -0.69249  | 1.77E-07  |
| Tmem176a    | 1.45E-13 | -0.70649  | 4.49E-09  |
| Tmem176b    | 1.99E-12 | -0.72074  | 6.18E-08  |
| Mgl2        | 1.84E-14 | -0.73344  | 5.71E-10  |
| Lars2       | 7.17E-20 | -0.78017  | 2.23E-15  |
| Cd81        | 9.48E-17 | -0.78229  | 2.94E-12  |
| ApoE        | 5.75E-22 | -0.86455  | 1.79E-17  |
| Selenop     | 1.24E-17 | -0.91699  | 3.86E-13  |
| AY036118    | 1.25E-71 | -2.99932  | 3.89E-67  |

**Supplemental Table 2**

| <b>Target</b> | <b>Clone</b> | <b>Fluorophore</b> | <b>Source</b> |
|---------------|--------------|--------------------|---------------|
| F4/80         | BM8          | FITC               | BioLegend     |
| CD11b         | M1/70        | PerCP-Cy5.5        | BD            |
| CCL5          | 2E9/CCL5     | PE                 | BioLegend     |
| CD64          | X54-5/7.1    | PE-CF594           | BioLegend     |
| FoxP3         | FJK-16s      | PE-Cy5             | Invitrogen    |
| CD8a          | 53-6.7       | PE-Cy7             | BD            |
| CD11c         | HL3          | APC                | BD            |
| CD45          | 30-F11       | AF700              | BioLegend     |
| NK1.1         | PK136        | APC-Cy7            | BioLegend     |
| CD103         | 2E7          | BV421              | BioLegend     |
| Viability     | n/a          | LD Aqua            | Invitrogen    |
| Ly6C          | HK1.4        | BV605              | BioLegend     |
| CD3           | 17A2         | BV650              | BioLegend     |
| CD19          | 6D5          | BV711              | BioLegend     |
| B220          | RA3-6B2      | BV711              | BioLegend     |
| I-A/I-E       | M5/114.15.2  | BV785              | BioLegend     |
| CD4           | GK1.5        | BUV395             | BD            |
| Ly6G          | 1A8          | BUV805             | BD            |
| Tim3          | RMT3-23      | FITC               | Invitrogen    |
| LAG-3         | C9B7W        | PerCP-Cy5.5        | BioLegend     |
| CTLA-4        | UC10-4B9     | PE-CF594           | BioLegend     |
| CD62L         | MEL-14       | PE-Cy5             | BioLegend     |
| CD39          | Duha59       | AF647              | BioLegend     |
| FoxP3         | MF-14        | BV421              | BioLegend     |
| PD-1          | 29F.1A12     | BV605              | BioLegend     |
| NK1.1         | PK136        | BV711              | BioLegend     |
| CD44          | IM7          | BV785              | BioLegend     |
| CD8a          | 53-6.7       | BUV805             | BD            |

**A**

| Treatment Group                                                                                                          | Sample Number | Estimated Number of Cells | Mean Reads per Cell | Median Genes per Cell |
|--------------------------------------------------------------------------------------------------------------------------|---------------|---------------------------|---------------------|-----------------------|
| <br>Untreated                            | 1             | 1,067                     | 79,663              | 595                   |
|                                                                                                                          | 2             | 712                       | 66,662              | 730                   |
|                                                                                                                          | 3             | 1,325                     | 57,646              | 865                   |
|                                                                                                                          | 4             | 1,816                     | 55,261              | 1,019                 |
| <br>CD40 Agonist                         | 1             | 1,774                     | 60,080              | 1,173                 |
|                                                                                                                          | 2             | 927                       | 84,328              | 596                   |
|                                                                                                                          | 3             | 252                       | 51,345              | 1,036                 |
|                                                                                                                          | 4             | 2,902                     | 31,436              | 1,618                 |
| <br>ICB ( $\alpha$ CTLA4+ $\alpha$ PD-1) | 1             | 2,670                     | 43,033              | 889                   |
|                                                                                                                          | 2             | 1,263                     | 80,614              | 758                   |
|                                                                                                                          | 3             | 1,516                     | 74,173              | 1,514                 |
|                                                                                                                          | 4             | 1,341                     | 76,166              | 1,036                 |
| <br>CD40 + ICB                           | 1             | 2,830                     | 14,729              | 986                   |
|                                                                                                                          | 2             | 5,324                     | 7,225               | 833                   |
|                                                                                                                          | 3             | 2,251                     | 19,814              | 1,144                 |
|                                                                                                                          | 4             | 3,738                     | 12,005              | 1,057                 |

**B**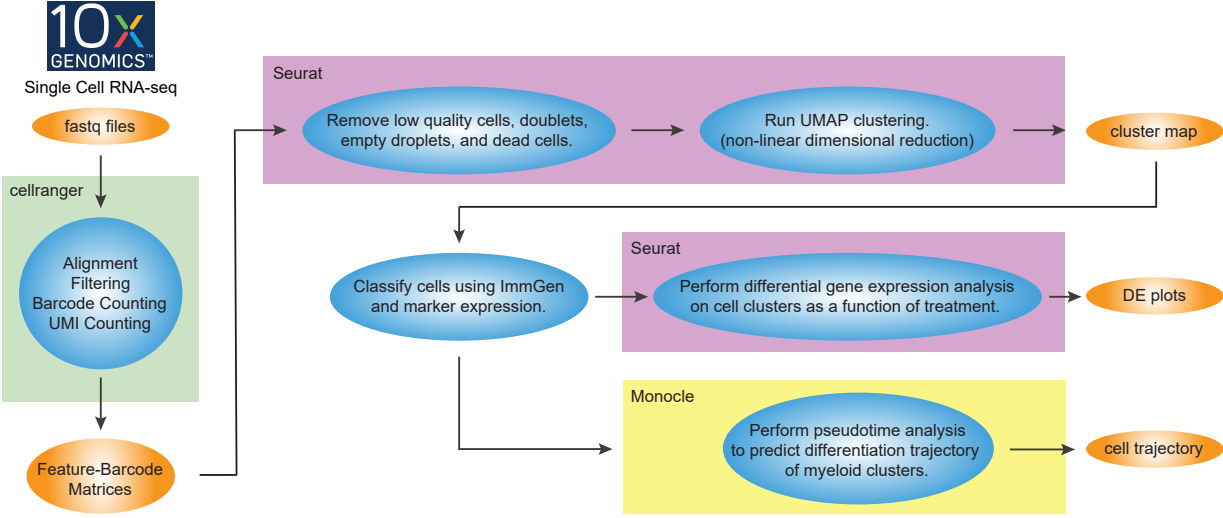

**Supplemental Figure 1** Single cell analysis pipeline and details.

**(A)** Cell and transcriptomic metrics from each single-cell library. Metrics were generated using the 10X Genomics CellRanger 3.0 software.

**(B)** Single-cell transcriptomic analysis pipeline following library sequencing. Software packages are color-coded.

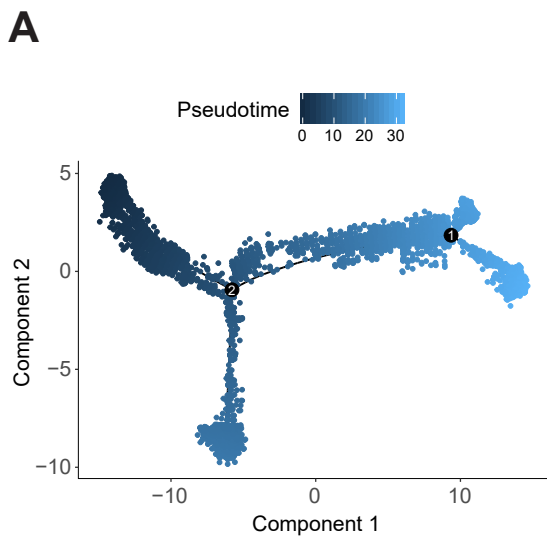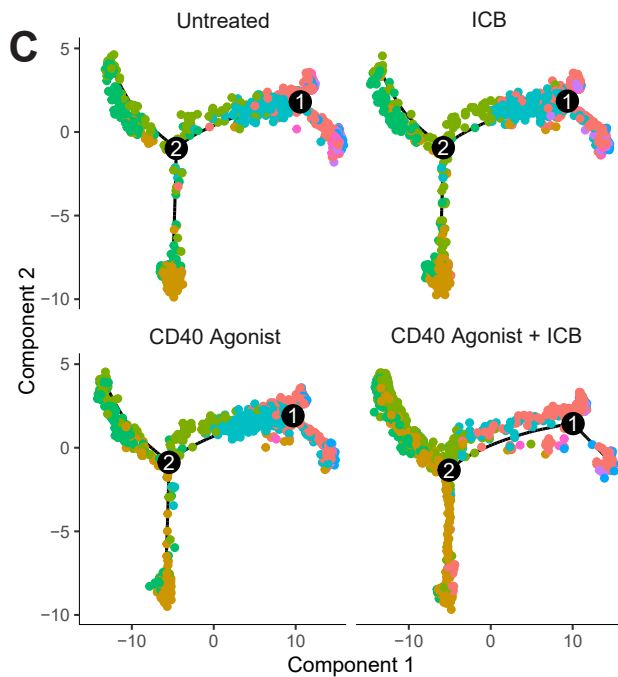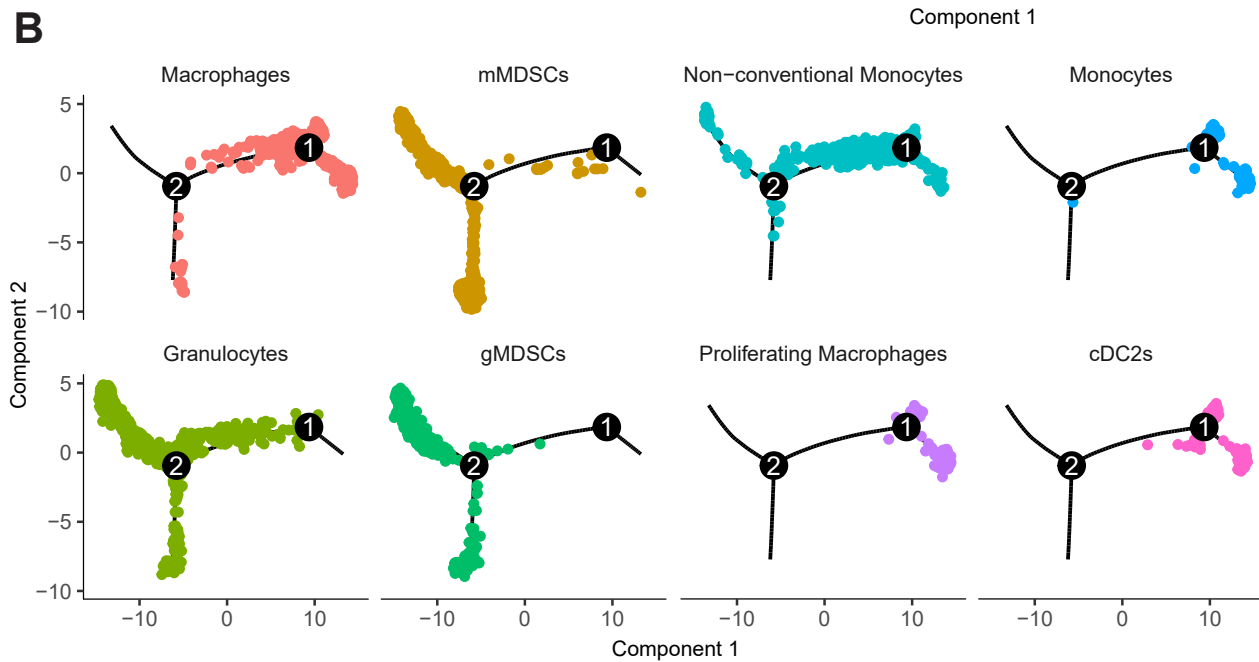

**Supplemental Figure 2** Myeloid cell differentiation is unaffected by treatment with CD40 agonist and immune checkpoint blockade.

**(A)** Pseudotime trajectory of myeloid cell clusters across all treatment groups as calculated using Monocle2.

**(B)** Plots of each myeloid cell cluster along pseudotime trajectory.

**(C)** Pseudotime trajectory of myeloid cell clusters split by treatment group.

(A): n=6,510 cells from myeloid cell clusters across all treatment groups as determined in Seurat were used as input for Monocle pseudotime analysis. (B): n=1,764 macrophages, n=1,301 mMDSCs, n=1218 granulocytes, n=802 gMDSCs, n=710 non-conventional monocytes, n=252 monocytes, n=241 proliferating macrophages, and n=222 cDC2s shown. (C): n=1,448 untreated, n=1,635 ICB, n=1,284 CD40 agonist, n=2,143 CD40/ICB cells shown.

## Untreated

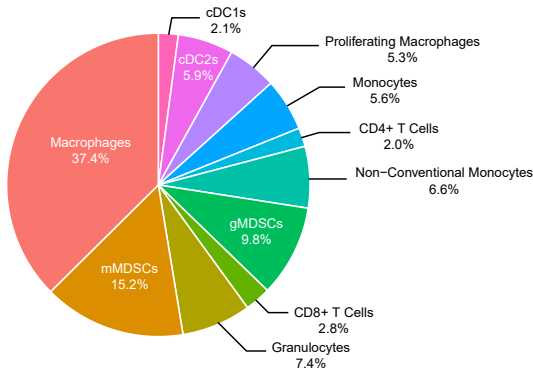

## ICB

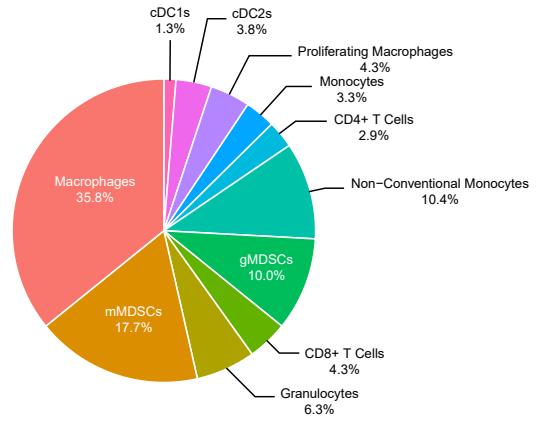

## CD40 Agonist

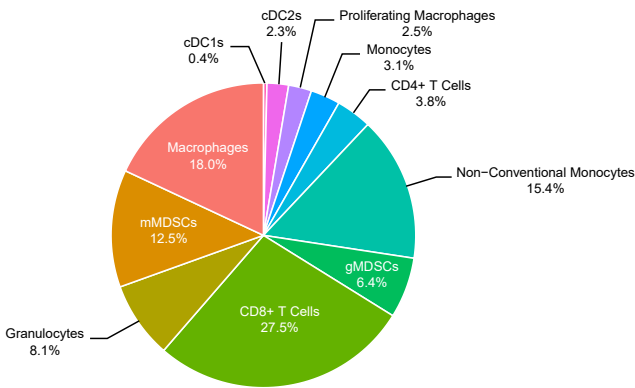

## CD40 Agonist + ICB

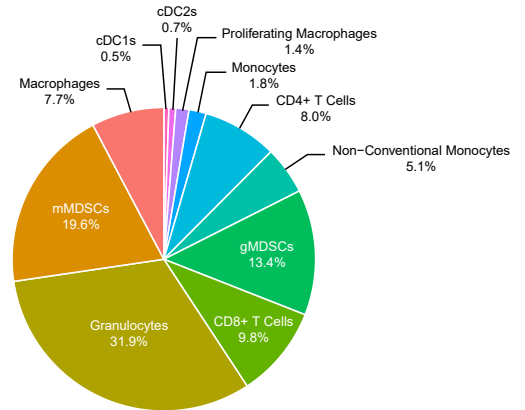

### **Supplemental Figure 3**

Proportion of each immune cell cluster split by treatment group.



**A**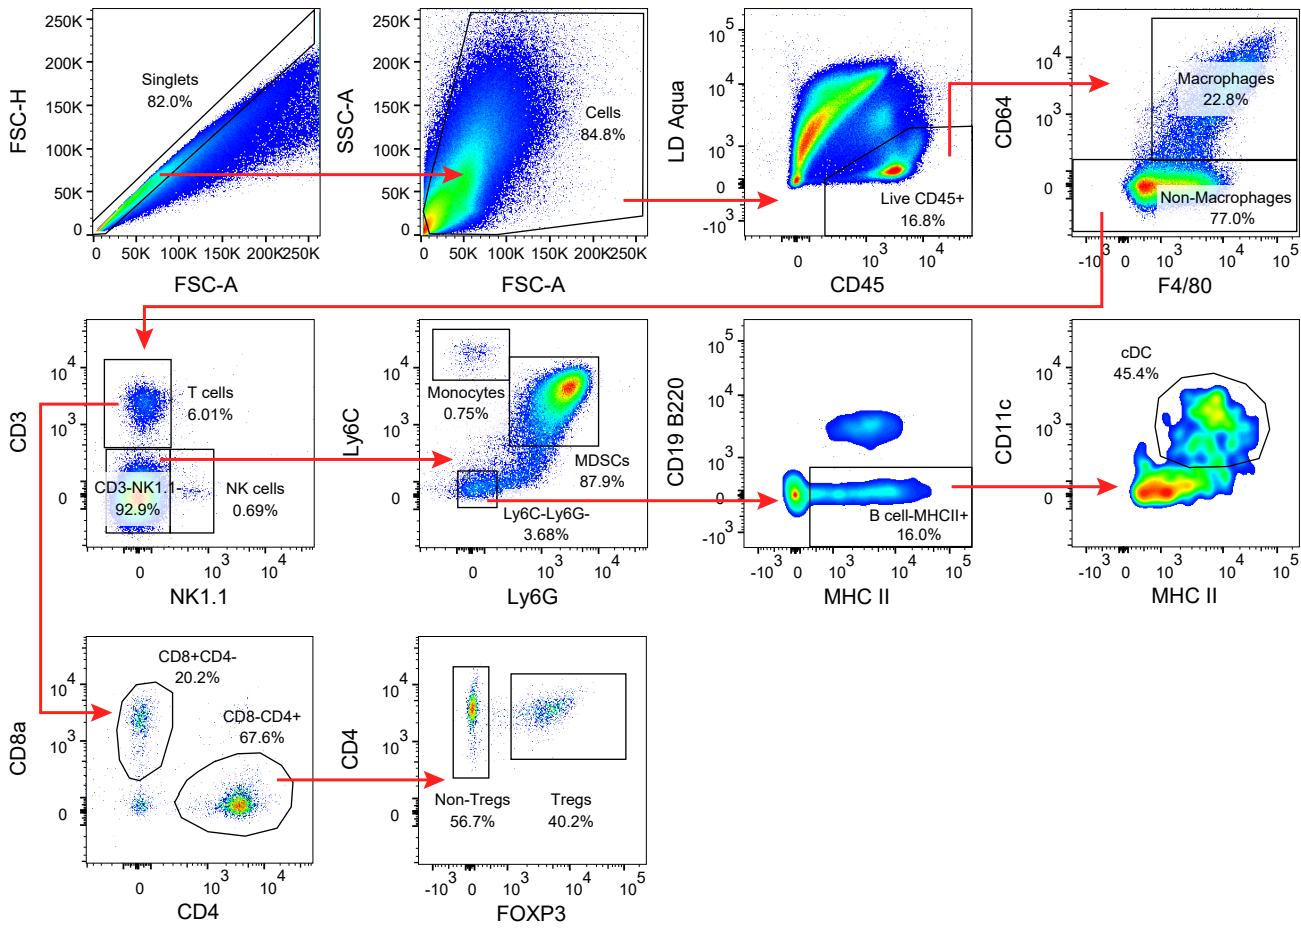**B**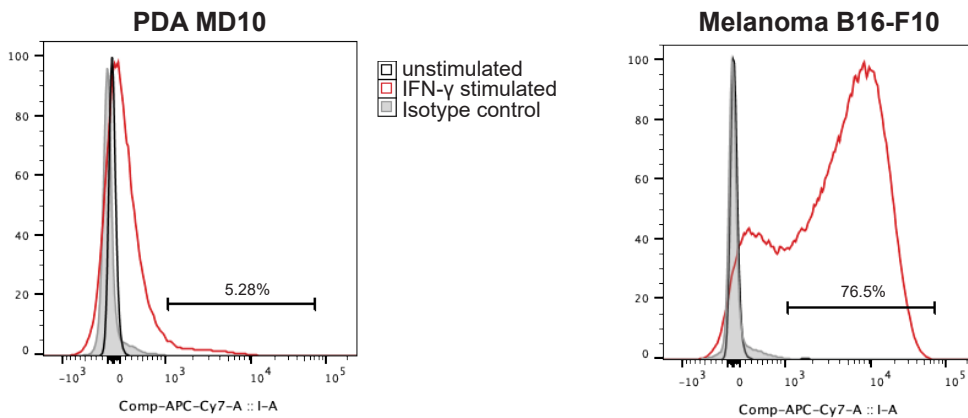

#### **Supplemental Figure 4**

**(A)** Gating scheme for flow cytometric identification of immune populations in a representative subcutaneously implanted KPC tumor.

**(B)** Flow cytometry comparison of 4662.MD10 and B16-F10 MHCII expression.

## A Treatment Groups

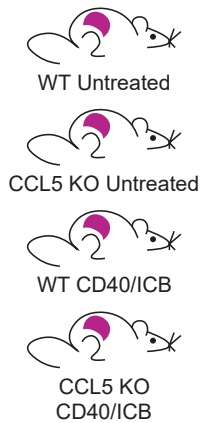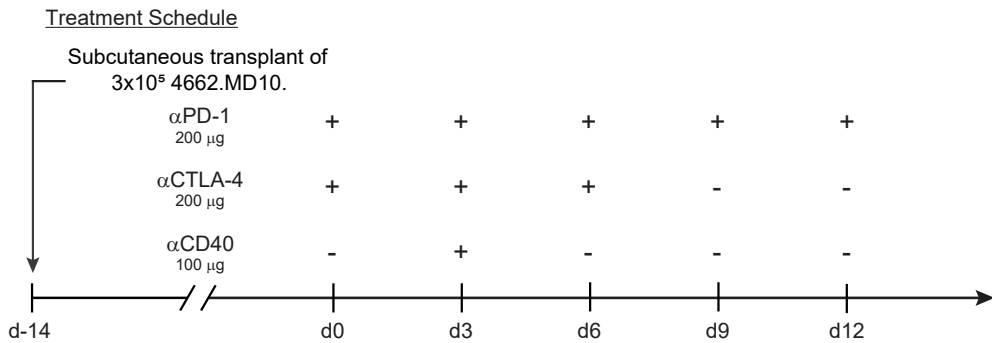

## B Treatment Groups

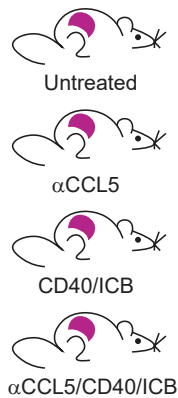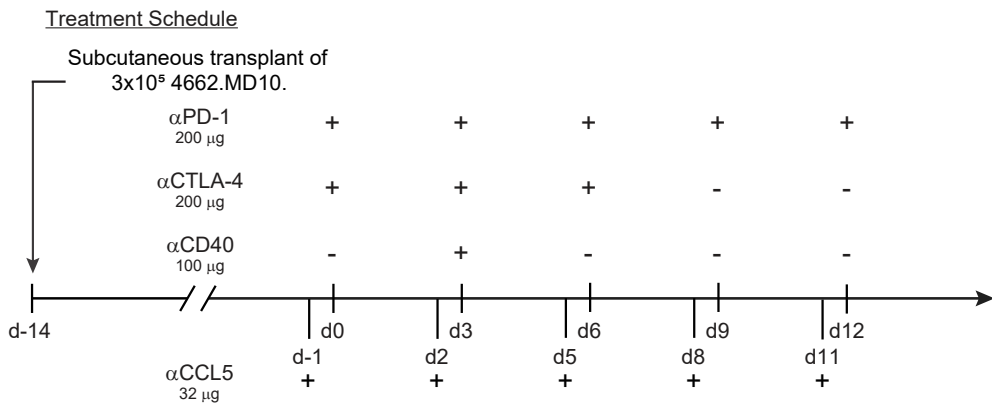

## Supplemental Figure 5

**(A)** Treatment schema of C57BL/6J and CCL5 KO mice subcutaneously implanted with clonal KPC cell line *4662.MD10* with combination CD40/ICB.

**(B)** Treatment schema of C57BL/6J mice subcutaneously implanted with clonal KPC cell line *4662.MD10* with combination CD40/ICB +/- anti-CCL5.

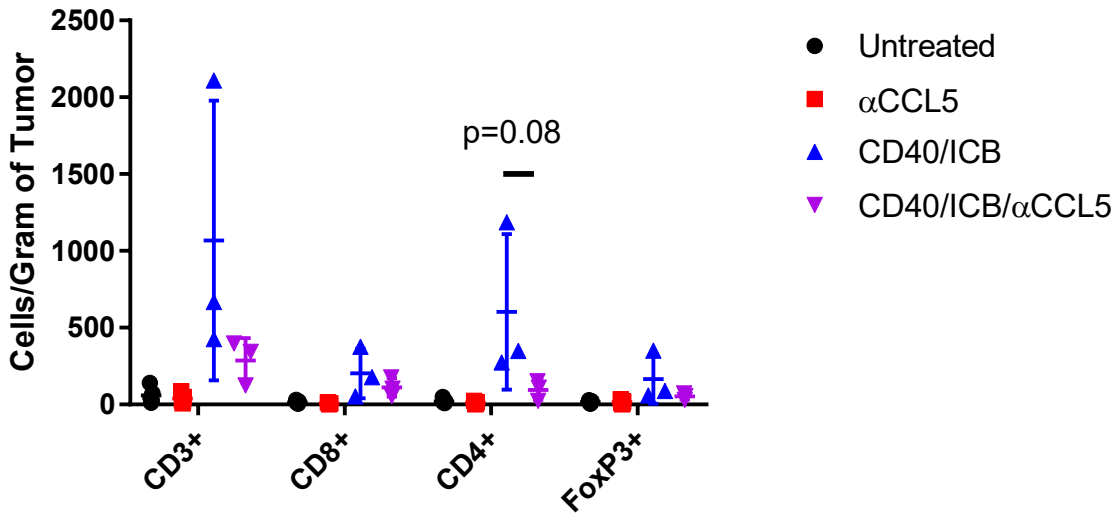

## **Supplemental Figure 6**

Enumeration of T-cell populations per gram of tumor in mice treated with combination CD40/ICB +/-  $\alpha$ CCL5 day 12 post-implantation. Corresponds to Figure 5B.
